# Supplementary material for: Glial β-Oxidation regulates Drosophila Energy Metabolism
Source: PubMed Central journal article supplement — Sci Rep. 2015 Jan 15;5:7805. doi: 10.1038/srep07805 (PMC4295106; doi:10.1038/srep07805), 2015-01-15
Supplement: srep07805-s1.pdf [file srep07805-s1.pdf]

## Supplementary data

### Glial $\beta$ -Oxidation regulates *Drosophila* Energy Metabolism

Joachim G. Schulz, Antonio Laranjeira, Leen Van Huffel, Annette Gärtner, Sven Vilain, Jarl Bastianen, Paul P. Van Veldhoven, and Carlos G. Dotti

#### Endogenous expression of dCPT2 in fly brain

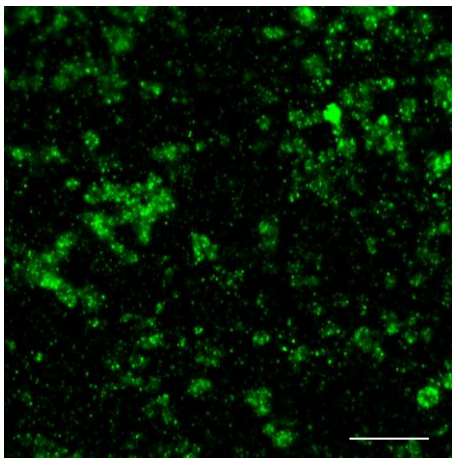

**dCPT2-GFP knock in**

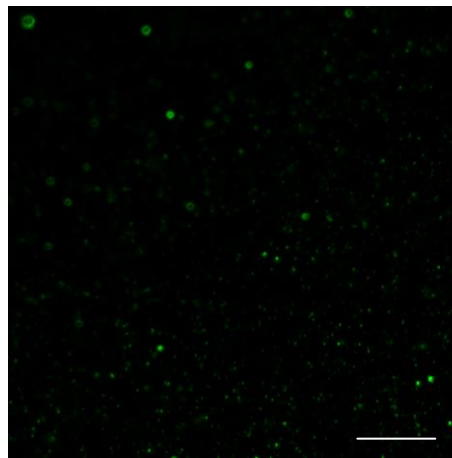

**Canton S control**

Confocal images of adult central brains stained with anti-GFP, scale bar corresponds to 10 $\mu$ m.
